# Supplementary material for: Distribution of cross-tropopause convection within the Asian monsoon region from May through October 2017
Source: Copernicus journal article supplement (doi:10.5194/acp-2022-641), 2022-10-04
Supplement: Supplementary file [file acp-2022-641-AC1-supplement.pdf]

## Response to Referee 1

We thank the reviewer for their insightful and thorough criticism. By addressing their comments, we have improved the study as described below. The reviewer's comments are shown in black, and our responses are shown in blue.

This is an interesting and important study, which merits its publication in ACP. However the scientific content, the quality of the study and its presentation (in particular the figures) should be further improved. I suggest some major revisions before publication by ACP.

General comments:

1) The quality, the size and the description of the figures should be improved. Some of the figures should be enlarged and it would be helpful to get a more detailed description of the presented quantities (more details see below).

The presentation of the figures, including the size and description, has been improved as recommended. In general, the figures were reorganized to allow for significant enlargement and text has been added to provide additional details to the descriptions. The specifics of the changes to each figure will be discussed in our responses to the comments below.

2) In the last years, many publications are published regarding convection in the region of the Asian monsoon. The StratoClim aircraft campaign was performed in Kathmandu (Nepal) in summer 2017 probing air in the Asian monsoon anticyclone conducted in same year as the study by Clapp et al, ACPD, 2022. I think it is worth to discuss some of the results of the StratoClim aircraft campaign in connection to the results by Clapp et al, ACPD,2022 to demonstrate differences and similarities found for 2017 (some of the papers related to StratoClim aircraft campaign are already mentioned by Clapp et al, ACPD,2022 e.g. Legras & Bucci, 2020; Johansson et al, 2020, von Hobe et al., 2021...). There is a special issue to StratoClim in ACP: [https://acp.copernicus.org/articles/special\\_issue1012.html](https://acp.copernicus.org/articles/special_issue1012.html). Here (and also in the references), the authors can find more literature related to convection and vertical transport in the region of the Asian monsoon. I recommend to revise the introduction a bit to give the reader a more comprehensive overview about the topic.

A specific discussion of the results of the StratoClim campaign has been added to the introduction to provide additional context to our study, particularly an emphasis on the selection of 2017 as the year of study for the sake of comparison (Brunamonti et al., 2018; Bucci et al., 2020; Johansson et al., 2020; Khaykin et al., 2022; Lee et al., 2019; Lee et al., 2021; Legras & Bucci, 2020; Nützel et al., 2019; Vogel et al., 2019; von Hobe et al., 2021; Yan et al., 2019). This discussion is also extended to a section in the conclusion.

3) It is sometimes difficult to follow the presented analysis. Some more detailed description and motivation would be helpfully for a better understanding (details see below). In particular the wording is sometimes strange e.g.' We identify seasonal trends'. I think it should be called intraseasonal variability or evolution. A trend would cover a much longer time period (e.g. an increasing trend for OTs occurrence during the last ten years in the Asian monsoon region). I recommend to change the wording throughout the manuscript. 4) The tropopause height is a key

parameter for the analysis presented. More details about its calculation and variability should be presented (more details see below).

We agree that the verbiage of ‘trends’ was vague and improperly applied. The wording throughout the manuscript has been updated to ‘intraseasonal variability’ as recommended. Additional details about the usage of tropopause height has been added to the results section. A supplementary section including a figure showing the distribution of local tropopause heights of the OT database has also been added. Our responses to specific concerns about additional details are provided below.

-----  
Major comments:

P1 L22: 'the contributions across the entire region'. Unclear, please clarify this.

The sentence was edited as follows for clarification: “This work demonstrates that when evaluating the effects of convection on lower stratospheric composition over the Asian monsoon region it is important to consider the impact of cross-tropopause convection specifically, as well as the contributions from both land-based and oceanic regions due to the significant geographic and monthly variation in convective activity.”

P1/2 L25-40: Convection in the Asian monsoon region is discussed for many years. Therefore several references regarding convection in the Asian monsoon region exists up to now. Please add here some more relevant citations.

Additional pertinent citations addressing the role of convection in the Asian monsoon region have been added to relevant sentences within the paragraph referred to here. (Brioude et al., 2010; Claxton et al., 2019; Lelieveld et al., 2018; Park et al., 2007; Pisso et al., 2010; Randel et al., 2010; Santee et al., 2017; Tegtmeier et al., 2020).

P2 L41: 'Satellite observations have shown consistent indications of tropospheric influence in water vapor and carbon monoxide maxima as well as ozone minima concurrent with the Asian monsoon anticyclone that develops in the UTLS region'. Enhanced mixing ratios of more chemical trace gases tropospheric-origins than H<sub>2</sub>O and CO as well as of aerosol are found within the Asian monsoon anticyclone compared to the background air in these altitudes. Please revise this sentence and be a bit more comprehensive. This is mentioned later in L46-53. That is confusing, please rearrange these parts of the introduction.

The sentence has been reworded and the paragraph has been reorganized to introduce the compositional characteristics of the Asian monsoon anticyclone more comprehensively in conjunction with the following paragraph.

P2 L44: What means 'these perturbations'. Please clarify.

Additional clarifying text has been added: “the convective source of these water vapor, carbon monoxide, and ozone perturbations.”

P2 L51: Aerosol measurement in the region of the Asian monsoon is discussed in several publications. It would be fair to add in addition to Vernier et al. some other studies e.g. by Höpfner et al., Nat. Geosci., 2019 (<https://www.nature.com/articles/s41561-019-0385-8>); Hanumanthu et al., ACP, 2019 (<https://doi.org/10.1029/2003JD003770>); Brunamonti et al., 2018 (<https://doi.org/10.5194/acp-18-15937-2018>); Bian et al., Natl. Sci. Rev., 2020 (<https://doi.org/10.1093/nsr/nwaa005>). There exist even more papers. The authors should decide which references are most suited.

Additional suitable references, including those recommended, have been added. (Bian et al., 2020; Brunamonti et al., 2018; Hanumanthu et al., 2020; Höpfner et al., 2019).

P2 L53: Enhanced VSLs were measured within the Asian monsoon anticyclone in 2017 and their ODPs were calculated (see Adcock et al., JGR, 2021; <https://doi.org/10.1029/2020JD033137>)

A citation of Adcock et al., 2021 was added.

P2 L54: The authors should add a short explanation of the general upward transport in the region of the Asian monsoon.

A short paragraph detailing the general upward transport in the Asian monsoon region with relevant citations was added to the introduction.

P2 L61: 'The location and timing of the initial deep convection influence both the chemical impact of convective transport on the composition of the UTLS and the geographic distribution of that impact.'--> This sounds odd. Maybe better 'The location and timing of the initial deep convection influence the kind and amount of tropospheric source gases and aerosol transported into the altitudes of the Asian monsoon anticyclone (or in UTLS altitudes) ....'

The sentence was reworded as follows: "The location and timing of deep convection influence the kind and amount of tropospheric source gases and aerosol transported into the AMA."

P2 L64: 'therefore which regions are impacted "downstream" in the large-scale circulation.' Please clarify.

The phrasing has been clarified as follows: "Furthermore, the location of the initial convective transport determines the pathway of entry into the lower stratosphere and therefore which regions are impacted by subsequent transport within the large-scale circulation."

P3 L70-79: Many of the cited studies are based on model simulations. In models, different treatments of convection are used (e.g. different meteorological reanalyses, different parameterisations of convection) yielding different results. I think this should be mentioned somehow. Further, it would be useful to distinguish in the discussion between studies that are based on model simulations from studies that are based on observations to identify the locations of convective sources.

In this paragraph additional text noting which studies are based on model simulations, and which are based on observations has been added. The potential effects of different treatments of convection within models were also noted.

P4 L117: 'analyzing large scale trends' Please specify, trends of what? (see general comment 3.)

As recommended in comment 3, the phrase has been reworded in terms of intraseasonal variability: “the intraseasonal variability and evolution of OT geospatial and temporal distributions.”

P4 L123: '(see Figure 1c)' -> '(see Figure 1d)' In the text, first Fig. 1a should be cited. Please rearrange the figures accordingly. I recommend to first show Fig. 1d as a separate Fig. 1 (+corresponding legend, details see below).

Figure 1 has been rearranged such that Fig. 1d is now a separate figure that is introduced prior and is referenced first. As a result, the original Figure 1 is now Figure 2.

P4 L124: 'to allow for comparison to prior work' Please add some references to prior work.

Additional references were added to this sentence: “e.g. Bergman et al., 2013; Fu et al., 2006; Heath & Fuelberg, 2014.”

P5 L130: Please add some more recent references.

More recent references have been added (Bhat & Kumar, 2015; Saikranthi et al., 2018; Virts & Houze, 2016).

P5 L139: 'The Indian Ocean region captures and separates the influence of the ITCZ, seen in the OT distribution (Figure 1a), from the other two regions.' Sentence is unclear, please specify which other two regions. For me it looks like that the Indian subcontinent is located between the regions with highest OTs occurrence. Add a legend for the regions to Fig. 1d to avoid any misunderstanding. I recommend to show Fig. 1d (+ Legend) as separate Figure 1.

The sentence was reworded to specify the other two regions: “The Indian Ocean region captures and separates the influence of the intertropical convergence zone (ITCZ), seen in the OT distribution (Figure 2a), from the other two oceanic regions (Bay of Bengal and Arabian Sea).” As recommended, Fig 1d has been separated into an independent figure 1 with a legend.

P5 L140: Convection on the northwestern Indian subcontinent was discussed i.a. in Höpfner et al., Nature Geoscience, 2019, as a potential source for the Asian tropopause aerosol layer (ATAL) in summer 2017. I think it is worth to mention it here. Further Khaykin et al., ACP, 2022 (<https://doi.org/10.5194/acp-22-3169-2022>) identified several convective source contribution to air masses probed during the StratoClim aircraft campaign in 2017.

The Höpfner et al. (2019) reference was added here, and the Khaykin et al. (2022) reference was integrated into several sentences where it was pertinent.

P6 L160: Fig. 1a should be enlarged (e.g. show only the dotted-white box). It is good to show the entire Asian monsoon anticyclone, however the main regions of OTs occurrence are difficult to

see. Maybe it would be better to focus here on the OTs and show the anticyclone in Fig. 1b/c. Further, something is wrong with the labels at the y-axis.

Figure 1 (now Figure 2, see above comment) has been substantially revised, including enlarging Fig. 1a, making the depiction of the anticyclone Montgomery contours less intrusive, improving the general visibility, and the separation of Fig. 1d.

P6 L163: 'The Indian Ocean shows a high volume of dispersed cross-tropopause convection located at the ITCZ in an east-west band between 0-5° N.' This sentence is confusing. During boreal summer the ITCZ is located further north of 0-5° N.

The sentence was rephrased for clarity given the general understanding of the ITCZ: "The Indian Ocean shows a high volume of dispersed cross-tropopause convection located in an east-west band around the equator." The Indian Ocean, however, has a "double" ITCZ during the summer months (Berry & Reeder, 2014; Hu et al., 2007; Waliser & Gautier, 1993) with a southern band that has overlap with the OT cluster. Discussion of the overlap was added to the section dedicated to the OT distribution within the Indian Ocean region.

P6 L167: 'This high count of intense convective events has been previously observed' -> 'This high count of intense convective events over the Arabian Peninsula ...'

The suggested clearer wording was implemented.

P6 L167: 'The distribution shows..' -> 'The spacial distribution of OTs over Asia (Fig. 1a) shows ...'

The suggested clearer wording was implemented.

P/ L181: I think is worth to mention, that Legras and Bucci (2020) is also related to the Asian summer monsoon 2017 just as Clapp et al., ACPD, 2022. P/ L184 '..but the subsequent diabatic ascent into the lower stratosphere occurs primarily in neighboring regions'. Please explain this general upward transport in the region of the Asian monsoon in more detail.

A discussion of the general upward transport in the Asian monsoon region was added to the introduction and recalled here. The overlap in study time periods between this study and Legras and Bucci (2020) was also noted.

P7 L191: 'Figures 1b and 1c show the OLR minimum and average daily value for the entire study period.' as mean values over the study period from 1 May to 31 October 2017. Yes or trend ?? Please clarify.

The confusing "trend" wording was replaced with "distribution:" "The minimum OLR spatial distribution, as a proxy for the "deepest" convection, matches the cross-tropopause convective distribution better than the average OLR."

P7 L200: 'Figures 1c and 1d show the GPCP maximum daily precipitation and average daily precipitation for the entire study period.' in each grid-box? 'Figures 1c and 1d' --> 'Figures 1e and 1f'

The figures show the GPCP maximum daily precipitation and average daily precipitation for the entire study period for each grid-box. Text indicating this was added. The figure misattribution was also corrected.

P8 Fig. 2: caption 'Figure 1' -> 'Figure 2'. Please enlarge the height of the panels. It is difficult to see the different lines.

The caption was fixed, and the figure reorganized with the months as rows rather than columns to allow for a significant enlargement of all the panels.

P8 L222: 'For example, the active months of May through August contribute on average 22.9% of the total OTs while September and October contribute 13.4% and 6.3%, respectively.' I can not see these percentages in Fig2. Please explain this in more detail.

The sentence was split in two and detail was added to clarify that the percentages cited reflect the cumulative number of OTs that occurred within each month and were not the average daily values shown in the figure: "For example, during the active months of May through August, on average 22.9% of the total OTs occur per month. In contrast, during the months of September and October 13.4% and 6.3% of total OTs occur, respectively."

P8 L231: I would not call this 'outlier'. Better something like 'OT caused by specific meteorological conditions'

The suggested clearer wording was implemented.

P8 L233-240: The contributions of the different regions is an important result. To highlight this result even better, I recommend to summarize the contributions of different region in an additional table.

We agree that a table would better summarize the regional contributions, and one has been added.

P9 Fig. 3: caption 'Figure 1' -> 'Figure 3'. Please enlarge the height of the panels.

The caption was fixed, and the figure reorganized with the months as rows rather than columns to allow for a significant enlargement of all the panels.

P9 L250: --> 'Figure 3 shows the frequency distributions of OTs in 1K intervals for each month related to ...' Yes? Why is the frequency distributions of OTs shown versus the average and maximum potential temperature of OTs and not versus the the potential temperature itself. Please clarify your choice and explain in more detail how the frequency distributions are calculated? It would be good to show the distance to the tropopause (Fig.3b/d) also in pot. temperature (in K) to make it comparable to Fig. a/c.

OTs detected in this study consist of multiple pixels identified from the Meteosat-8 multispectral imagery. Here, a pixel refers to the minimum spatial unit resulting from the Meteosat-8 horizontal resolution (approximately 4 km). We report OTs as distinct events rather than by pixel count because the temporal resolution (15 minutes) is insufficient to account for the full temporal/spatial evolution of an OT. We characterize each individual OT both by the average

potential temperature of its constituent pixels and by the maximum potential temperature reached by its constituent pixels.

As suggested, we recalculated the tropopause relative analysis in terms of potential temperature.

A discussion of the composition of each OT by individual pixels, and the decision to calculate the distributions by OT rather than by pixel was added to the methods section. To the discussion of Figure 3, text identifying the average and maximum potential temperatures as the average of and maximum within the pixels that comprise each individual OT has been added.

P9 L255/257: '...of the pixels within each OT.' --> please clarify 'pixels'?

See the above response to the referee's comment.

P9 L264: 'As this trend is present in tropopause relative height as well as potential temperature, it is indicative of more vigorous convection rather than simply being a consequence of the seasonal vertical motion of the tropopause.' I would call this not 'trend', better 'shift of the maximum of OTs frequency distributions during summer 2017'. Add the mean pot. temperature of the tropopause for each month in Fig. 3a/c to demonstrate the vertical shift of the tropopause from May until October. What is the variability of the tropopause height during one month? Is the distance to the tropopause calculated for each OT to the tropopause and subsequently the mean distance to the tropopause is calculated or is for each OT the distance to the mean tropopause calculated. Please clarify this point.

The wording has been changed from “trend” to “shift.” The sentence was also reworded to indicate that the usage of the tropopause relative vertical coordinate shows that the increase in potential temperatures reached by OTs results in further intrusion into the stratosphere, even as the tropopause is higher in potential temperature later in the season.

To illustrate the vertical shift of the tropopause from May through October, a supplemental figure showing the daily average of the local tropopause potential temperatures associated with each OT has been added. The monthly average tropopause height is lowest in May (370.5 K), rises through August (374.8 K), before declining through October (371.6 K). The standard deviation of tropopause potential temperature across the entire time period is 3.9 K. May has the greatest change in tropopause height within a single month, with a standard deviation of 5.5 K.

The distance to the tropopause is calculated for each individual OT using the local tropopause, and subsequently the mean of these values is calculated. An explanation of this calculation has been added to the paragraph that introduces Figure 3.

P10 L269: 'This is visible in the large number of OTs within the highest bins (337 and 572 OTs for average and maximum tropopause height, respectively), which capture all OTs that reach a height above 2.95 km above the tropopause.' What is the maximum height above the tropopause of these extreme convective events? This peak at 3.0 km looks odd. The authors should enlarge the x-axis up to the maximum height above the tropopause (shown in level of pot. temperature).

The distribution of potential temperatures reached by OTs exhibits a long tail, up to one OT with a potential temperature of 493 K (121 K tropopause relative potential temperature). As such,



including the full range of the distribution would decrease the visibility of the figure. For this reason, all values outside of the range shown in histogram are included in the uppermost and lowermost bins. Additional explanatory text has been added, and supplemental figures that show the distribution of the long tails not shown explicitly in Figure 3 have been added.

P10 L275: 'seasonal distribution' -> 'intraseasonal distribution' P10 Fig. 4: Similar question as to Fig.3: Why is the frequency distributions of OTs shown versus the average and maximum potential temperature of OT and not versus the the potential temperature itself. Maybe there is a misunderstanding, please clarify. Show in addition the distance to the tropopause in potential temperature coordinates.

See the response to the referee's comment on P9 L250 for an explanation of the frequency distribution analysis. The tropopause relative height coordinate has been updated to potential temperature coordinates.

P11 L96: 'This northward migration is consistent with the expected geographic evolution of the Asian monsoon (Kajikawa et al., 2012; Romatschke et al., 2009)'. The northward movement of the Indian summer monsoon is known for a long time in India. It would be respectful to cite here also some references from Indian colleagues. e.g references in Goswami, B. N.: South Asian monsoon, in: Intraseasonal Variability in the Atmosphere-Ocean Climate System, 2nd edn., chap. 2, edited by: Lau, W. K. M. and Waliser, D. E., Springer-Verlag, Berlin, Heidelberg, 21–72, 2012. I am sure there are more.

To correct this large oversight, we have added the following citations: Abhik et al., 2013; Ganai et al., 2019; Goswami, 2011; and Sikka & Gadgil, 1980.

P11 Fig. 5: The individual plots are too small. The numbers on the x-axis are truncated.

The figure has been reorganized with the months as rows rather than columns to allow for a significant enlargement of all the panels and clearer axis labelling.

P11 L311: '... the regions of most frequent cross-tropopause convection are co-located with the most extreme OLR and precipitation values.' For me is the co-location of OTs and OLR not so evident. Please rephrase this sentence.

The sentence has been reworked and expanded upon to add a more nuanced description and interpretation of areas of agreement as well as areas of disagreement.

P11 L311: 'seasonality' -> 'intraseasonality'

The suggested wording was added.

P12 L322: 'This is likely due to the lower tropopause in the earlier months' It would be very helpful for the understanding of the presented results and their interpretation to demonstrate the intraseasonal variability of the tropopause height over the Asian monsoon region.

To illustrate the intraseasonal variability of the tropopause from May through October, a supplemental figure showing the daily average of the local tropopause potential temperatures associated with each OT has been added.



P11 Fig. 5: The individual plots are too small. The titles are truncated. The arrows indicating the horizontal winds in the bottom row are not visible without strong zoom in. Please enlarge all figures.

The figure has been reorganized with the months as rows rather than columns to allow for a significant enlargement of all the panels.

P14 L383: 'seasonal trends' -> 'intraseasonal variability'

The suggested wording was added.

P15 L387: 'Most of this convection occurs within the Indian subcontinent with North India contributing 29.0% of all OTs, South India contributing 11.7% of all OTs, and the Bay of Bengal contributing 15.2% of all OTs. Together with the Indian Ocean region (19.2%), the most cross-tropopause convection occurs in these regions, and they cumulatively account for 75.1% of all OTs.' That sounds odd and I don't think that the Bay of Bengal is on the Indian subcontinent. --> 'Most of the OTs occurs over South Asia with contributions mainly from North India (29.0%), Indian Ocean region (19.2%), the Bay of Bengal (15.2%) and South India (11.7%) in summary 75.1% of all OTs.' A table listing the contributions of all regions would be very helpful.

The sentence has been rephrased as suggested, and a table of regional contributions has been added.

P15 L393: 'maximum height of 387 K corresponding to 1.46 km above the tropopause.' As discussed above I think it is more useful to give the distance to the tropopause in K.

The tropopause relative vertical coordinate has been changed to potential temperature.

P15 L394: 'seasonal trends' -> 'intraseasonal variability'

The suggested wording was implemented.

P15 L403: 'In the Arabian Sea, most OTs occur in June, with a "hotspot" corresponding to a single large storm system.' I'm confused in line L374 is written 'is likely sourced from a single large storm system'. Please clarify. It would strengthen your results if you could demonstrate this is connected (maybe indicating the storm track in your figures) to the storm system or not.

A supplementary figure and relevant text have been added that show the storm track of the large storm system in the first week of June in the Arabian Sea with visible reflectance near 0.6 microns data from the gridded International Satellite Cloud Climatology Project B1 (Knapp et al., 2011).

P15 L403: 'Whether these trends in cross-tropopause convection are recurring features should be explored in future research.' I recommend to remove this sentence. If you draw a connection to future projects, it sounds that your study is incomplete.

The purpose of describing potential future studies is to extend the scientific conversation by indicating new scientific questions that arise from the conclusions of this study that were previously not considered or could not be formulated without the context of this study.

P15 L408 'In contrast to prior work that has emphasized either oceanic (e.g. James et al., 2008) or land-based (e.g. Bergman et al., 2013) convective source regions as dominant, we find that both contribute significant amounts, though with different seasonal distributions.' Please clarify: dominant sources of convection impacting the lower stratosphere / the chemical composition Asian monsoon anticyclone or just the occurrence of convection ?? Further, in the last decades there are several studies analyzing possible convective source regions contributing to the Asian monsoon anticyclone, ATAL or the lower stratosphere over Asia. I remember that both different source regions are identified as well as their intraseasonal variability. The authors should discuss this issue more comprehensively including more references. The authors mention already some references in the introduction.

The sentence has been reworded to clarify that the topic is dominant sources of convection impacting the lower stratosphere. Additional discussion has been added to more comprehensively compare our results to studies which analyzed convective source regions of the Asian monsoon anticyclone.

P15 L416-424: I am not sure if this paragraph is an added value for the conclusions, maybe it can be removed or moved to other sections.

A brief description of the limitations of the study can be important context for readers to properly evaluate the implications of the conclusions presented and prevent overstatements.

P15 L425-435: The authors should revise this paragraph and sharpen their main messages.

The concluding paragraph has been revised to communicate the main conclusions of the study more clearly.

-----  
minor comments:

P1 L22: 'the contributions across the entire region' -> 'contributions from different regions' ??

Reworded to "contributions across both land-based and oceanic regions."

P2 L36: 'are transported' -> 'are transported upwards'

Reworded as suggested.

P4 L123: '(see Figure 1c)' -> '(see Figure 1d)'

Corrected.

P5 L139: ITCZ is not introduced

The acronym is defined.

P5 L148: 'OLR' -> 'outgoing long-wave radiation' (avoid shortcuts in titles)

Reworded as suggested.

P5 L155: 'and time period' -> 'and time period from 1 May to 31 October 2017'

Reworded as suggested.

P5 L154: 'We then compare the distribution of cross-tropopause convection with other convective indicators:' -> 'The distribution of cross-tropopause convection is compared with other convective indicators such as ...' (two times in succession 'We..' is used at the beginning of the sentence)

Reworded as suggested.

P6 Fig.1: 'the total OTs observed in each region' -> 'the total number of OTs ...'

Reworded as suggested.

P10 L275: 'Figure 2' -> 'Fig. 2a'

Reworded as suggested.

## References

- Abhik, S., Halder, M., Mukhopadhyay, P., Jiang, X., and Goswami, B. N.: A possible new mechanism for northward propagation of boreal summer intraseasonal oscillations based on TRMM and MERRA reanalysis, *Clim. Dynam.*, 40, 1611-1624, 2013.
- Adcock, K. E., Fraser, P. J., Hall, B. D., Langenfelds, R. L., Lee, G., Montzka, S. A., Oram, D. E., Röckmann, T., Stroh, F., Sturges, W. T., Vogel, B., and Laube, J. C.: Aircraft-based observations of ozone-depleting substances in the upper troposphere and lower stratosphere in and above the Asian summer monsoon, *J. Geophys. Res.-Atmos.*, 126, e2020JD033137, 2021.
- Bergman, J. W., Fierli, F., Jensen, E. J., Honomichl, S., and Pan, L. L.: Boundary layer sources for the Asian anticyclone: Regional contributions to a vertical conduit, *J. Geophys. Res.-Atmos.*, 118, 2560-2575, 2013.
- Berry, G. and Reeder, M. J.: Objective identification of the intertropical convergence zone: Climatology and trends from the ERA-Interim, *J. Clim.*, 27, 1894-1909, 2014.
- Bhat, G. S. and Kumar, S.: Vertical structure of cumulonimbus towers and intense convective clouds over the South Asian region during the summer monsoon season, *J. Geophys. Res.-Atmos.*, 120, 1710-1722, 2015.
- Bian, J., Li, D., Bai, Z., Li, Q., Lyu, D., and Zhou, X.: Transport of Asian surface pollutants to the global stratosphere from the Tibetan Plateau region during the Asian summer monsoon, *Natl. Sci. Rev.*, 7, 516-533, 2020.
- Brioude, J., Portmann, R. W., Daniel, J. S., Cooper, O. R., Frost, G. J., Rosenlof, K. H., Granier, C., Ravishankara, A. R., Montzka, S. A., and Stohl, A.: Variations in ozone depletion potentials of very short-lived substances with season and emission region, *Geophys. Res. Lett.*, 37, L19804, 2010.

Brunamonti, S., Jorge, T., Oelsner, P., Hanumanthu, S., Singh, B. B., Kumar, K. R., Sonbawne, S., Meier, S., Singh, D., Wienhold, F. G., Luo, B. P., Boettcher, M., Poltera, Y., Jauhiainen, H., Kayastha, R., Karmacharya, J., Dirksen, R., Naja, M., Rex, M., Fadnavis, S., and Peter, T.: Balloon-borne measurements of temperature, water vapor, ozone and aerosol backscatter on the southern slopes of the Himalayas during StratoClim 2016–2017, *Atmos. Chem. Phys.*, 18, 15937–15957, <https://doi.org/10.5194/acp-18-15937-2018>, 2018.

Bucci, S., Legras, B., Sellitto, P., D'Amato, F., Viciani, S., Montori, A., Chiarugi, A., Ravegnani, F., Ulanovsky, A., Cairo, F., and Strohm, F.: Deep-convective influence on the upper troposphere-lower stratosphere composition in the Asian monsoon anticyclone region: 2017 StratoClim campaign results, *Atmos. Chem. Phys.*, 20, 12193-12210, 2020.

Claxton, T., Hossaini, R., Wild, O., Chipperfield, M. P., and Wilson, C.: On the regional and seasonal ozone depletion potential of chlorinated very short-lived substances, *Geophys. Res. Lett.*, 46, 5489-5498, 2019.

Fu, R., Hu, Y., Wright, J. S., Jiang, J. H., Dickinson, R. E., Chen, M., Filipiak, M., Read, W. G., Waters, J. W., and Wu, D. L.: Short circuit of water vapor and polluted air to the global stratosphere by convective transport over the Tibetan Plateau, *P. Natl. Acad. Sci. U. S. A.*, 103, 5664-5669, 2006.

Ganai, M., Mukhopadhyay, P., Krishna, R. P. M., Abhik, S., and Halder, M.: Revised cloud and convective parameterization in CFSv2 improve the underlying processes for northward propagation of Intraseasonal oscillations as proposed by the observation-based study, *Clim. Dynam.*, 53, 2793-2805, 2019.

Goswami, B. N.: South Asian summer monsoon, in: *Intraseasonal variability of the atmosphere-ocean climate system*, 2<sup>nd</sup> edn., edited by: Lau, W. K. -M. and Waliser, D. E., Springer, Berlin, Heidelberg, Germany, 21-72, 2011.

Hanumanthu, S., Vogel, B., Müller, R., Brunamonti, S., Fadnavis, S., Li, D., Olsner, P., Naja, M., Singh, B. B., Kumar, K. R., Sonbawne, S., Jauhiainen, H., Vömel, H., Luo, B., Jorge, T., Wienhold, F. G., Dirksen, R., and Peter, T.: Strong day-to-day variability of the Asian Tropopause Aerosol Layer (ATAL) in August 2016 at the Himalayan foothills, *Atmos. Chem. Phys.*, 20, 14273–14302, <https://doi.org/10.5194/acp-20-14273-2020>, 2020.

Heath, N. K. and Fuelberg, H. E.: Using a WRF simulation to examine regions where convection impacts the Asian summer monsoon anticyclone, *Atmos. Chem. Phys.*, 14, 2055-2070, 2014.

Höpfner, M., Ungermann, J., Borrmann, S., Wagner, R., Spang, R., Riese, M., Stiller, G., Appel, O., Batenburg, A. M., Bucci, S., Cairo, F., Dragoneas, A., Friedl-Vallon, F., Hünig, A., Johansson, S., Krasauskas, L., Legras, B., Lesner, T., Mahnke, C., Möhler, O., Molleker, S., Müller, R., Neubert, T., Orphal, J., Preusse, P., Rex, M., Saathoff, H., Strohm, F., Weigel, R., and Wohltmann, I.: Ammonium nitrate particles formed in upper troposphere from ground ammonia sources during Asian monsoons, *Nat. Geosci.*, 12, 608–612, 2019.

- Hu, Y., Li, D., and Liu, J.: Abrupt seasonal variation of the ITCZ and the Hadley circulation, *Geophys. Res. Lett.*, 34, L18814, 2007.
- Johansson, S., Höpfner, M., Kirner, O., Wohltmann, I., Bucci, S., Legras, B., Friedl-Vallon, F., Glatthor, N., Kretschmer, E., Ungermann, J., and Wetzel, G.: Pollution trace gas distributions and their transport in the Asian monsoon upper troposphere and lowermost stratosphere during the StratoClim campaign 2017, *Atmos. Chem. Phys.*, 20, 14695-14715, 2020.
- Khaykin, S. M., Moyer, E., Krämer, M., Clouser, B., Bucci, S., Legras, B., Lykov, A., Afchine, A., Cairo, F., Formanyuk, I., Mitev, V., Matthey, R., Rolf, C., Singer, C. E., Spelten, N., Volkov, V., Yushkov, V., and Stroh, F.: Persistence of moist plumes from overshooting convection in the Asian monsoon anticyclone, *Atmos. Chem. Phys.*, 22, 3169–3189, <https://doi.org/10.5194/acp-22-3169-2022>, 2022.
- Knapp, K. R., Ansari, S., Bain, C. L., Bourassa, M. A., Dickinson, M. J., Funk, C., Helms, C. N., Hennon, C. C., Holmes, C. D., Huffman, G. J., et al.: Globally gridded satellite observations for climate studies, *B. Am. Meteorol. Soc.*, 92, 893–907, 2011.
- Lee, K.-O., Barret, B., Flochmoën, E. L., Tulet, P., Bucci, S., von Hobe, M., Kloss, C., Legras, B., Leriche, M., Sauvage, B., Ravegnani, F., and Ulanovsky, A.: Convective uplift of pollution from the Sichuan Basin into the Asian monsoon anticyclone during the StratoClim aircraft campaign, *Atmos. Chem. Phys.*, 21, 3255–3274, <https://doi.org/10.5194/acp-21-3255-2021>, 2021.
- Lee, K.-O., Dauhut, T., Chaboureau, J.-P., Khaykin, S., Krämer, M., and Rolf, C.: Convective hydration in the tropical tropopause layer during the StratoClim aircraft campaign: pathway of an observed hydration patch, *Atmos. Chem. Phys.*, 19, 11803–11820, <https://doi.org/10.5194/acp-19-11803-2019>, 2019.
- Legras, B. and Bucci, S.: Confinement of air in the Asian monsoon anticyclone and pathways of convective air to the stratosphere during the summer season, *Atmos. Chem. Phys.*, 20, 11045-11064, 2020.
- Lelieveld, J., Bourtsoukidis, E., Brühl, C., Fischer, H., Fuchs, H., Harder, H., Hofzumahaus, A., Holland, F., Marno, D., Neumaier, M., Pozzer, A., Schlager, H., Williams, J., Zahn, A., and Ziereis, H.: The South Asian monsoon – pollution pump and purifier, *Science*, 361, 270-273, 2018.
- Nützel, M., Podglajen, A., Garny, H., and Ploeger, F.: Quantification of water vapour transport from the Asian monsoon to the stratosphere, *Atmos. Chem. Phys.*, 19, 8947–8966, <https://doi.org/10.5194/acp-19-8947-2019>, 2019.
- Park, M., Randel, W. J., Gettelman, A., Massie, S. T., and Jiang, J. H.: Transport above the Asian summer monsoon anticyclone inferred from Aura Microwave Limb Sounder tracers, *J. Geophys. Res.*, 112, D16309, 2007.
- Pisso, I., Haynes, P. H., and Law, K. S.: Emission location dependent ozone depletion potentials for very short-lived halogenated species, *Atmos. Chem. Phys.*, 10, 12025-12036, 2010.

Ploeger, F., Gottschling, C., Griessbach, S., Groß, J.-U., Guenther, G., Konopka, P., Müller, R., Riese, M., Stroh, F., Tao, M., Ungermann, J., Vogel, B., and von Hobe, M.: A potential vorticity-based determination of the transport barrier in the Asian summer monsoon anticyclone, *Atmos. Chem. Phys.*, 15, 13145–13159, <https://doi.org/10.5194/acp-15-13145-2015>, 2015.

Poshyvailo, L., Müller, R., Konopka, P., Günther, G., Riese, M., Podglajen, A., and Ploeger, F.: Sensitivities of modelled water vapour in the lower stratosphere: temperature uncertainty, effects of horizontal transport and small-scale mixing, *Atmos. Chem. Phys.*, 18, 8505–8527, <https://doi.org/10.5194/acp-18-8505-2018>, 2018.

Randel, W. J., Park, M., Emmons, L., Kinnison, D., Bernath, P., Walker, K. A., Boone, C., and Pumphrey, H.: Asian monsoon transport of pollution to the stratosphere, *Science*, 238, 611–613, 2010.

Santee, M. L., Manney, G. L., Livesey, N. J., Schwartz, M. J., Neu, J. L., and Read, W. G.: A comprehensive overview of the climatological composition of the Asian summer monsoon anticyclone based on 10 years of Aura Microwave Limb Sounder measurements, *J. Geophys. Res.-Atmos.*, 122, 5491–5514, 2017.

Saikranthi, K., Radhakrishna, B., Satheesh, S. K., and Rao T. N.: Spatial variation of different rain systems during El Niño and La Niña periods over India and adjoining ocean, *Clim. Dynam.*, 50, 3671–3685, 2018.

Sikka, D. R. and Gadgil, S.: On the maximum cloud zone and the ITCZ over Indian longitudes during the southwest monsoon, *Mon. Weather Rev.*, 108, 1840–1853, 1980.

Tegtmeier, S., Atlas, E., Quack, B., Ziska, F., and Krüger, K.: Variability and past long-term changes of brominated very short-lived substances at the tropical tropopause, *Atmos. Chem. Phys.*, 20, 7103–7123, 2020.

Virts, K. S. and Houze, R. A.: Seasonal and intraseasonal variability of mesoscale convective systems over the South Asian Monsoon Region, *J. Atmos. Sci.*, 73, 4753–4774, 2016.

Vogel, B., Müller, R., Günther, G., Spang, R., Hanumanthu, S., Li, D., Riese, M., and Stiller, G. P.: Lagrangian simulations of the transport of young air masses to the top of the Asian monsoon anticyclone and into the tropical pipe, *Atmos. Chem. Phys.*, 19, 6007–6034, <https://doi.org/10.5194/acp-19-6007-2019>, 2019.

von Hobe, M., Ploeger, F., Konopka, P., Kloss, C., Ulanowski, A., Yushkov, V., Ravagnani, F., Volk, C. M., Pan, L. L., Honomichl, S. B., Times, S., Kinnison, D. E., Garcia, R. R., and Wright, J. S.: Upward transport into and within the Asian monsoon anticyclone as inferred from StratoClim trace gas observations, *Atmos. Chem. Phys.*, 21, 1267–1285, 2021.

Waliser, D. E. and Gautier, C.: A satellite-derived climatology of the ITCZ, *J. Clim.*, 6, 2162–2174, 1993.

Yan, X., Konopka, P., Ploeger, F., Podglajen, A., Wright, J. S., Müller, R., and Riese, M.: The efficiency of transport into the stratosphere via the Asian and North American summer monsoon

circulations, *Atmos. Chem. Phys.*, 19, 15629–15649, <https://doi.org/10.5194/acp-19-15629-2019>, 2019.
